# Supplementary material
Source: Research Square preprint supplement (doi:10.21203/rs.3.rs-9238333/v1)
Supplement: Supplementary file 1 [file 12f0358154048aa166389aa6.docx]

Table S1. Statistics for the fitted models

| *Model* | *Statistics* | *Responses* | | | |
| --- | --- | --- | --- | --- | --- |
| **Height** | **Total dry biomass (TDB)** | **Leaf diameter** | Stem diameter |
| Linear | *P-Value* | 0,2510 | 0,1390 | 0,4737 | 0,4860 |
| *SE* | 6,4678 | 0,6832 | 0,9435 | 0,0293 |
| *R-Squared (%)* | 11,0600 | 15,1600 | 6,1600 | 5,9000 |
| *Adj. R-Squared (%)* | 0,0000 | 4,5600 | 0,0000 | 0,0000 |
| Quadratic | *P-Value* | 0,0001 | 0,0036 | 0,1415 | 0,0036 |
| *SE* | 4,2472 | 0,5330 | 0,8885 | 0,0229 |
| *R-Squared (%)* | 66,4400 | 54,8100 | 27,1900 | 49,9600 |
| *Adj. R-Squared (%)* | 56,8500 | 41,9000 | 6,3900 | 35,6600 |
| Special Cubic | *P-Value* | 0,0149 | 0,3922 | 0,0659 | 0,2256 |
| *SE* | 3,7388 | 0,5360 | 0,8348 | 0,0226 |
| *R-Squared (%)* | 75,2300 | 56,4800 | 38,7800 | 53,5800 |
| *Adj. R-Squared (%)* | 66,5600 | 41,2500 | 17,3500 | 37,3400 |
| Cubic | *P-Value* | 0,0026 | 0,0000 | 0,0000 | 0,0119 |
| *SE* | 2,6953 | 0,2686 | 0,4101 | 0,0179 |
| *R-Squared (%)* | 89,0600 | 90,7100 | 87,4400 | 75,2400 |
| *Adj. R-Squared (%)* | 82,6200 | 85,2400 | 80,0500 | 60,6800 |

SE represents the standard error, R² the coefficient of determination, and Adj. R² the adjusted coefficient of determination. P-values indicate model significance.

Table S2. ANOVA for the selected cubic models

| *Responses* | *Source* | *Sum of Squares* | *Df* | *Mean Square* | *F-Ratio* | *P-Value* |
| --- | --- | --- | --- | --- | --- | --- |
| Height | **Cubic Model** | 1005,32 | 10 | 100,532 | 15,34 | 0,0427 |
| **Lack-of-fit** | 110,39 | 15 | 7,35935 | 1,12 | 0,5689 |
| **Pure error** | 13,105 | 2 | 6,5525 |  |  |
| **Total (corr.)** | 1128,82 | 27 |  |  |  |
| Total dry biomass (TDB) | **Cubic Model** | 11,9771 | 10 | 1,19771 | 383,27 | 0,0026 |
| **Lack-of-fit** | 1,22069 | 15 | 0,0813791 | 26,04 | 0,0876 |
| **Pure error** | 0,00625 | 2 | 0,003125 |  |  |
| **Total (corr.)** | 13,204 | 27 |  |  |  |
| Leaf diameter | **Cubic Model** | 19,908 | 10 | 1,9908 | 12,55 | 0,0360 |
| **Lack-of-fit** | 2,54205 | 15 | 0,16947 | 1,07 | 0,5860 |
| **Pure error** | 0,3172 | 2 | 0,1586 |  |  |
| **Total (corr.)** | 22,7673 | 27 |  |  |  |
| Stem diameter | **Cubic Model** | 0,0165107 | 10 | 0,00165107 | 13,21 | 0,0424 |
| **Lack-of-fit** | 0,00518213 | 15 | 0,000345475 | 2,76 | 0,2977 |
| **Pure error** | 0,00025 | 2 | 0,000125 |  |  |
| Total (corr.) | 0,0219429 | 27 |  |  |  |

Table S3. Analysis of variance (ANOVA) for the selected cubic model

| *Source* | *Sum of Squares* | *Df* | *Mean Square* | *F-Ratio* | *P-Value* |
| --- | --- | --- | --- | --- | --- |
| Cubic Model | 0,0558399 | 10 | 0,00558399 | 111,68 | 0,0089 |
| Lack-of-fit | 0,0119539 | 15 | 0,00079693 | 15,94 | 0,0906 |
| Pure error | 0,0001 | 2 | 0,00005 |  |  |
| Total (corr.) | 0,0678939 | 27 |  |  |  |
